# Supplementary material for: A Strategy for Simultaneous Isolation of Less Polar Ginsenosides, Including a Pair of New 20-Methoxyl Isomers, from Flower Buds of Panax ginseng
Source: MDPI journal article supplement (doi:10.3390/molecules22030442), 2017-03-10
Supplement: s1 [file s1]

**A strategy for simultaneous isolation of less polar ginsenosides,  
including a pair of new 20-methoxyl isomers, from flower buds of  
*Panax ginseng*.**

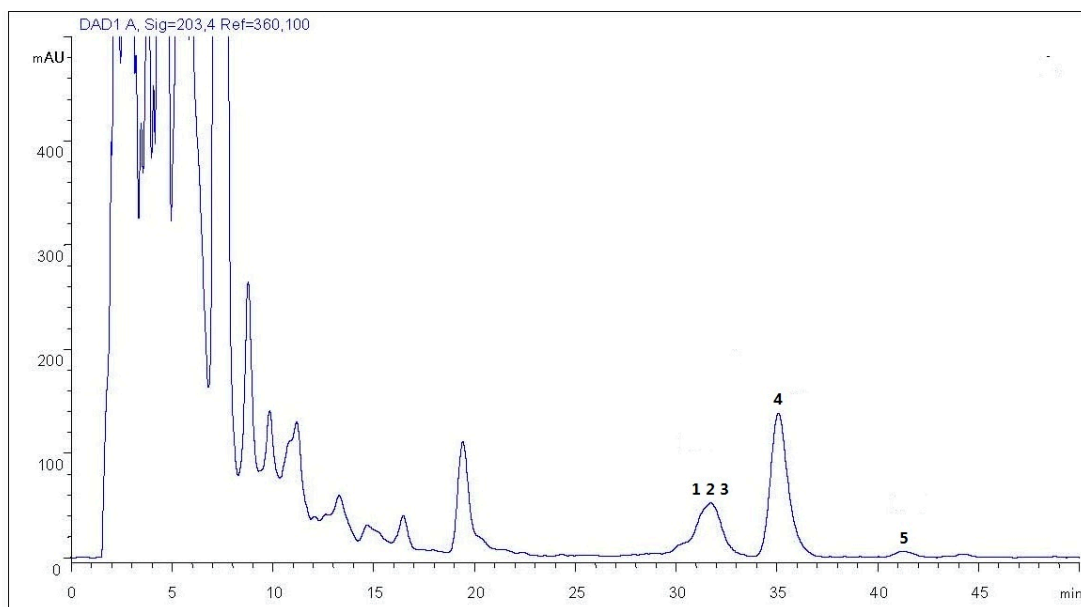

**Figure S1.** The chromatogram of crude ginsenosides extracts of FBPG after treatment with Diaion HP-20 macroporous resin column (methanol:water = 80:20). Peaks: 1, 20(*S*)-methoxyl-ginsenoside Rg<sub>3</sub>; 2, 20(*R*)-methoxyl-ginsenoside Rg<sub>3</sub>; 3, ginsenoside Rk<sub>1</sub>; 4, ginsenoside Rg<sub>5</sub>; 5, ginsenoside M1.

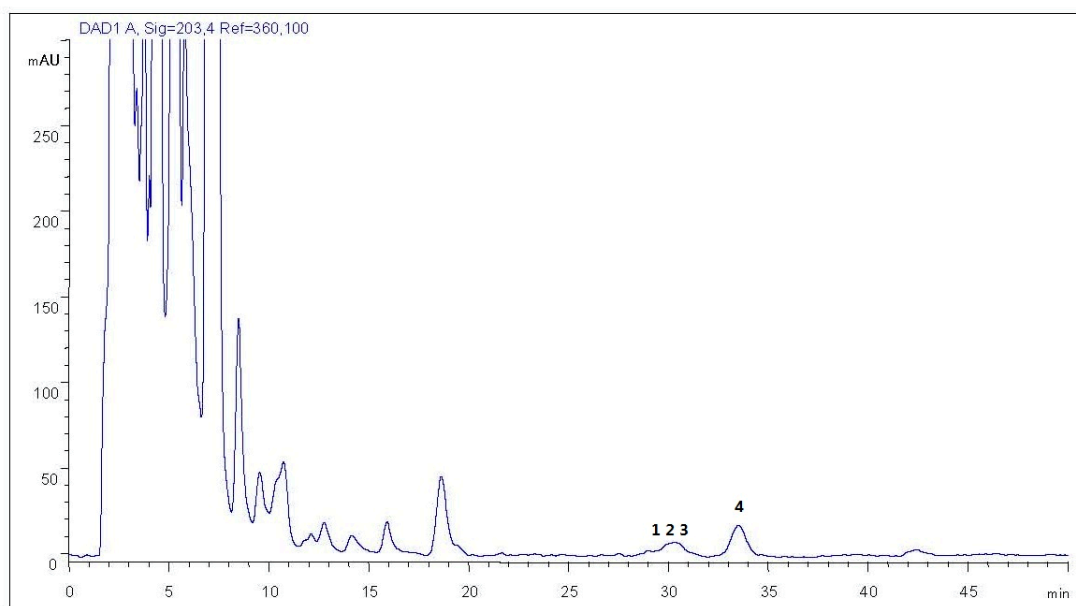

**Figure S2.** The chromatogram of ginsenosides fraction obtained from SPE with 68% methanol (methanol:water = 80:20).

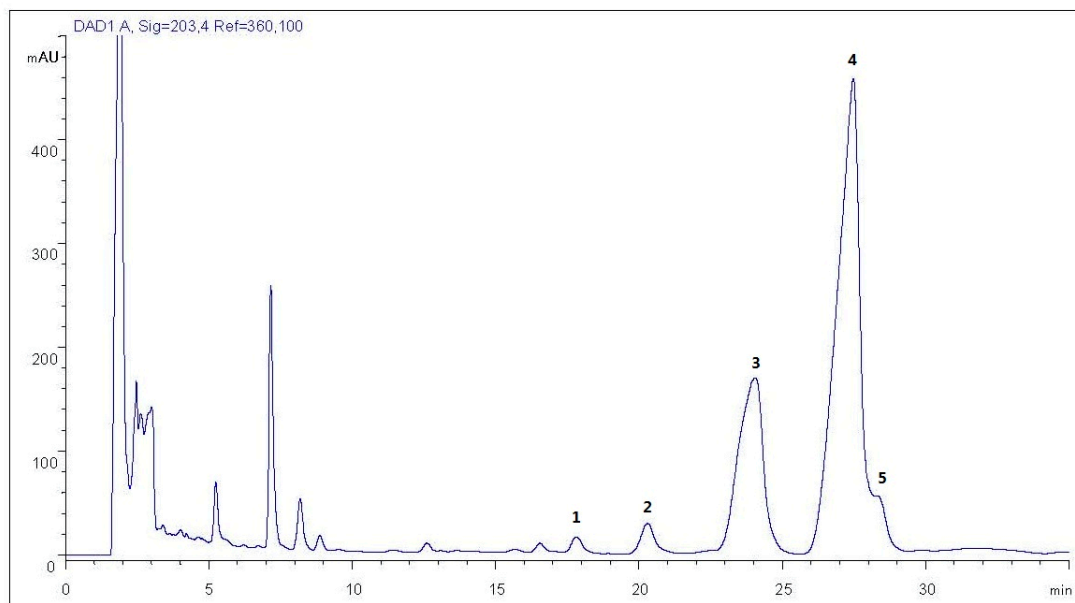

**Figure S3.** The chromatogram of ginsenosides fraction obtained from SPE with 80% methanol (acetonitrile-water = 50:47, flow rate 0.6 mL/min, column temperature 15°C).

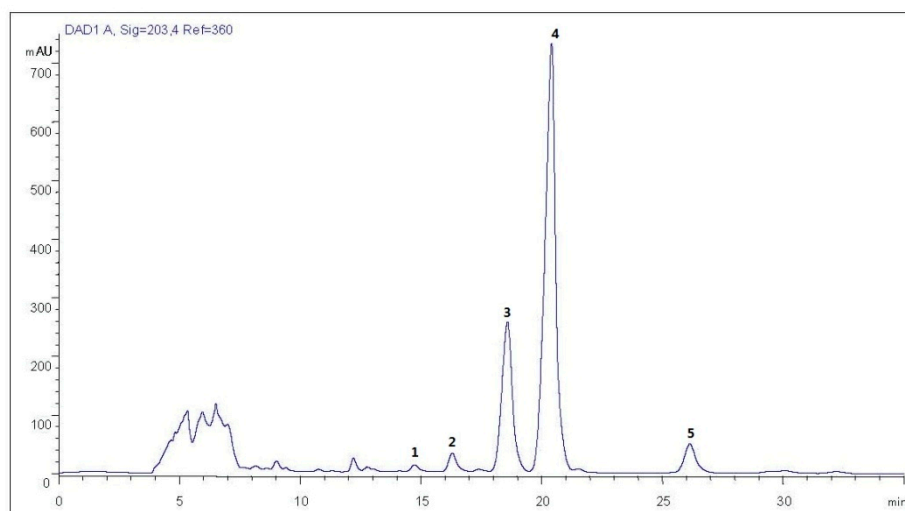

**Figure S4.** The chromatogram of ginsenosides fraction obtained from SPE with 80% methanol (acetonitrile-water = 53:47, flow rate 0.5 mL/min, column temperature 15°C).

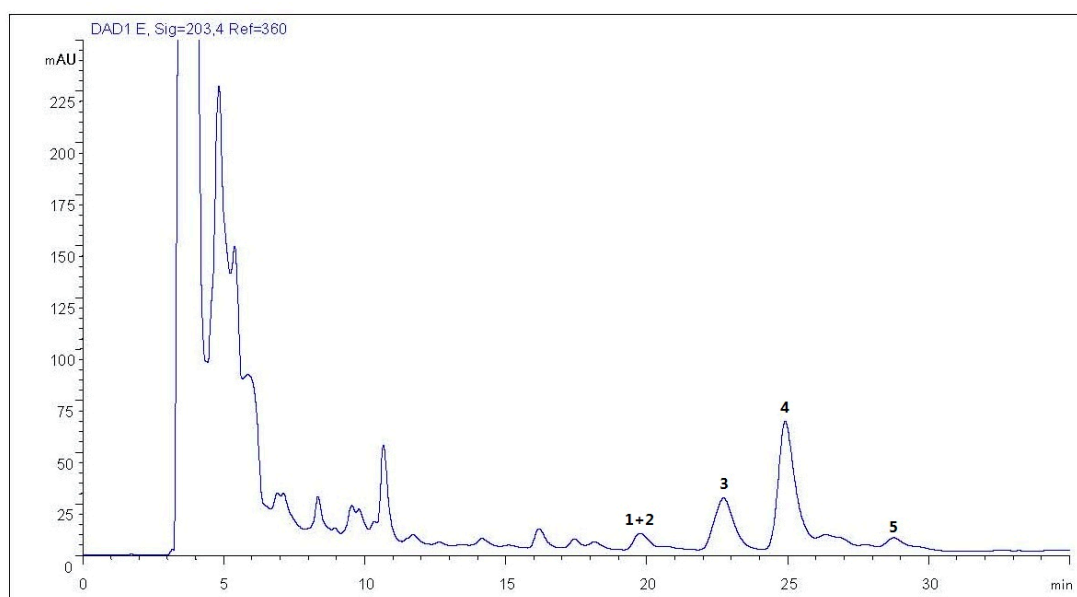

**Figure S5.** The chromatogram of ginsenosides fraction obtained from SPE with 80% methanol (acetonitrile-water = 53:47, flow rate 0.6 mL/min, column temperature 25°C).

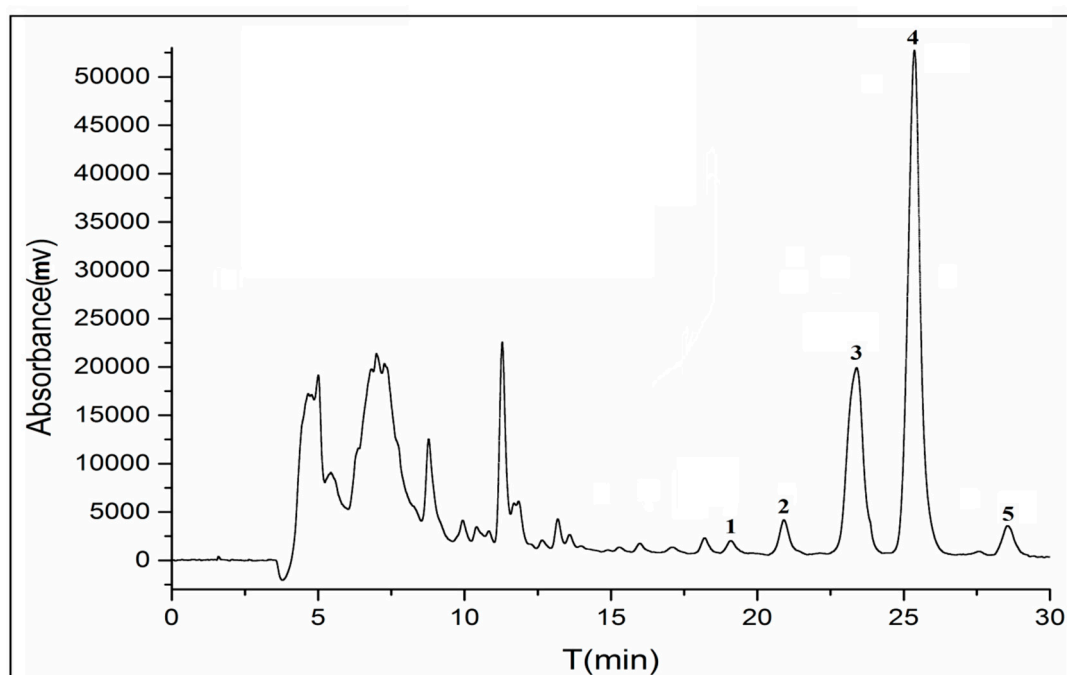

**Figure S6.** The semi-preparative chromatogram of ginsenosides fraction obtained from SPE with 80% methanol.

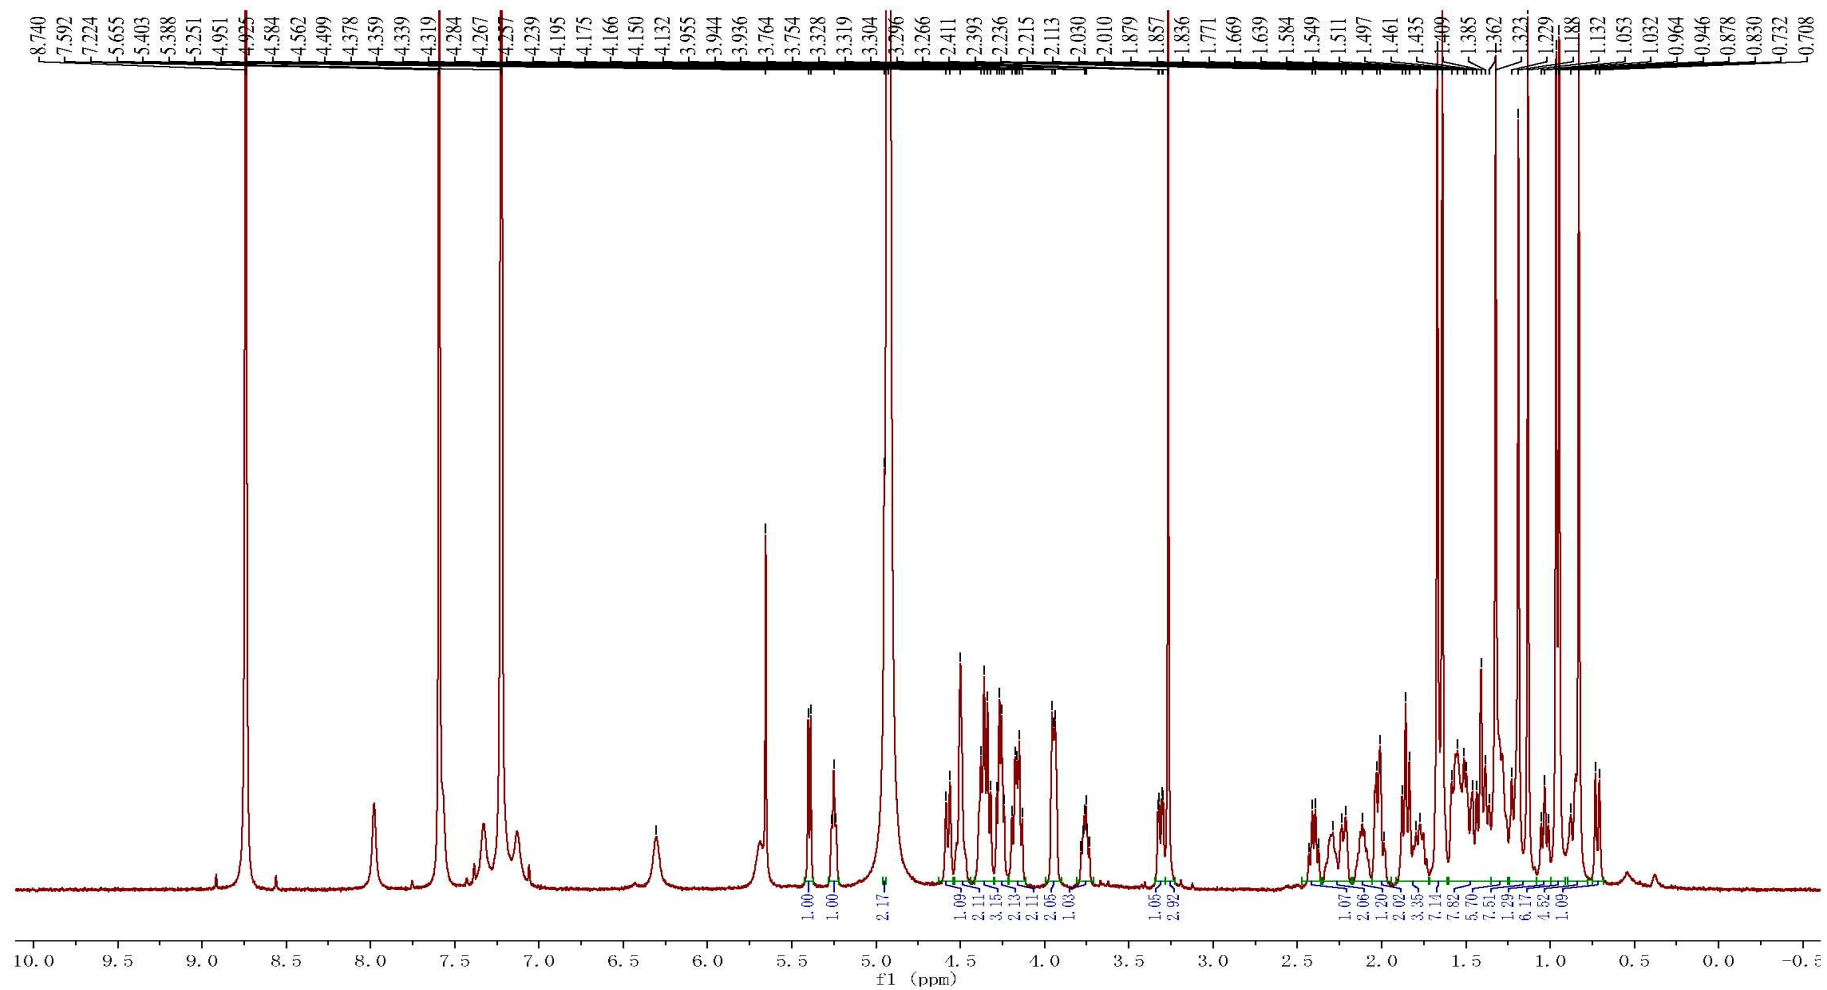

Figure S7.  $^1\text{H}$  NMR spectrum of compound **1** in pyridine- $d_5$ .

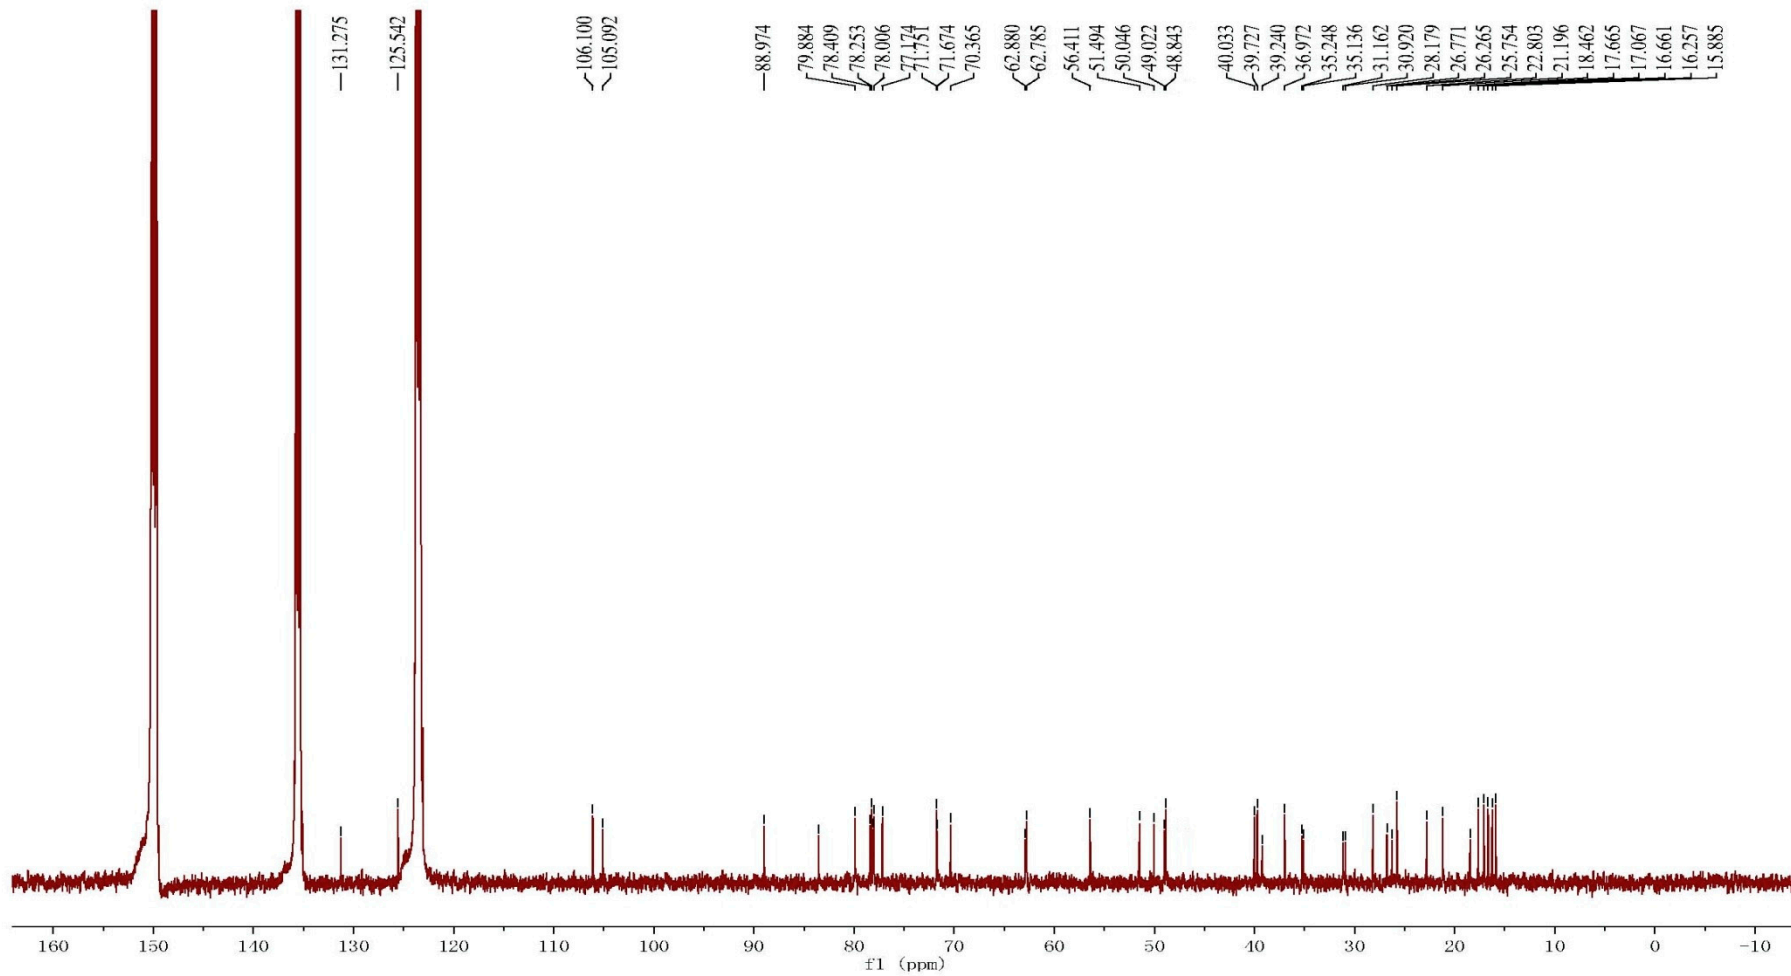

**Figure S8.**  $^{13}\text{C}$  NMR spectrum of compound **1** in pyridine- $d_5$ .

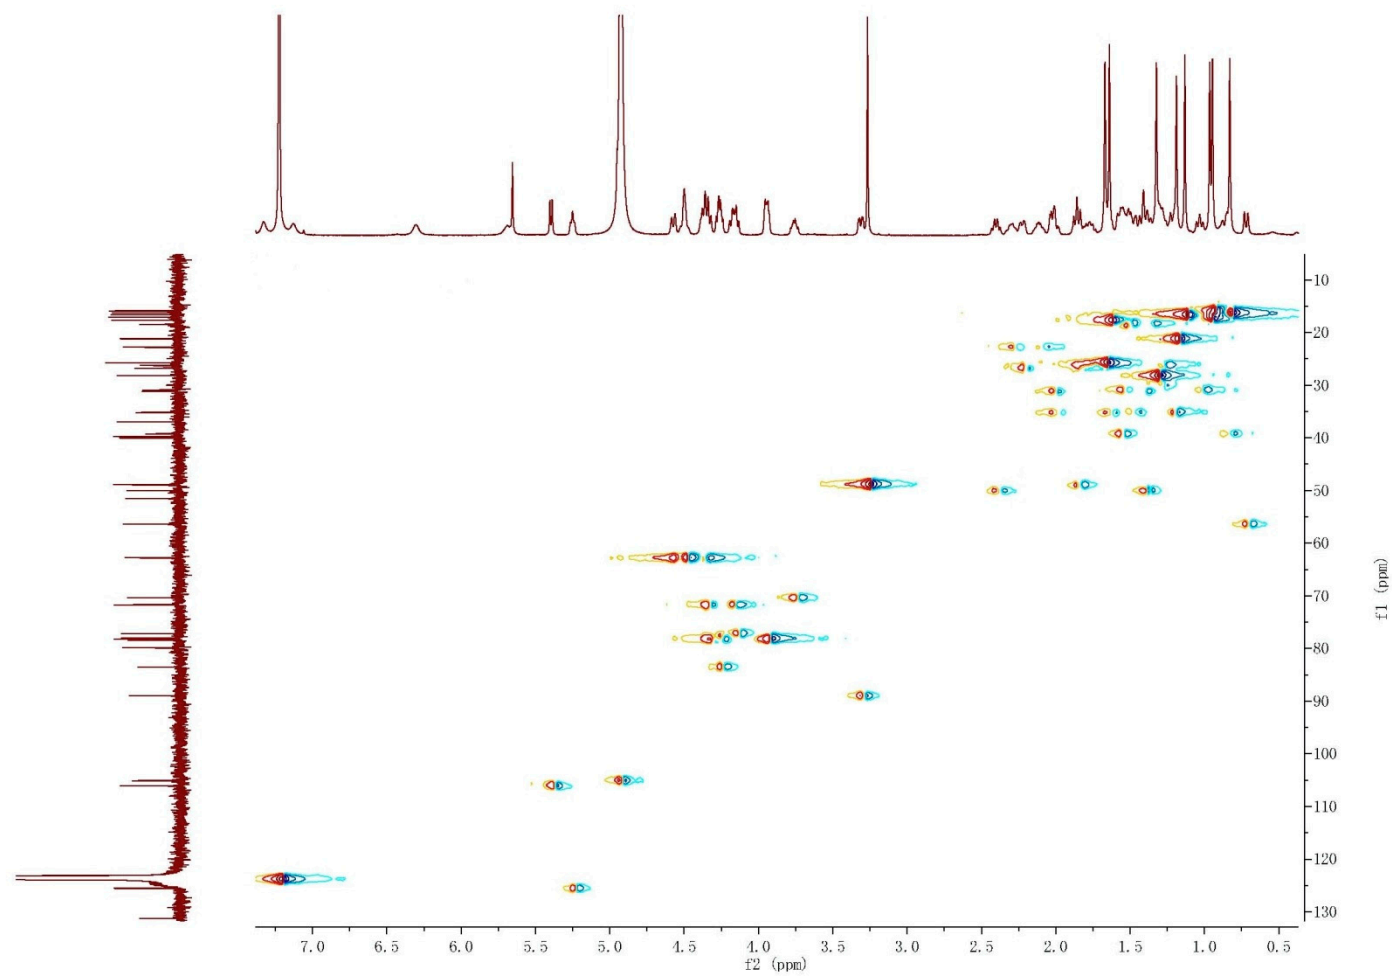

**Figure S9.** HSQC spectrum of compound **1** in pyridine-*d*<sub>5</sub>.

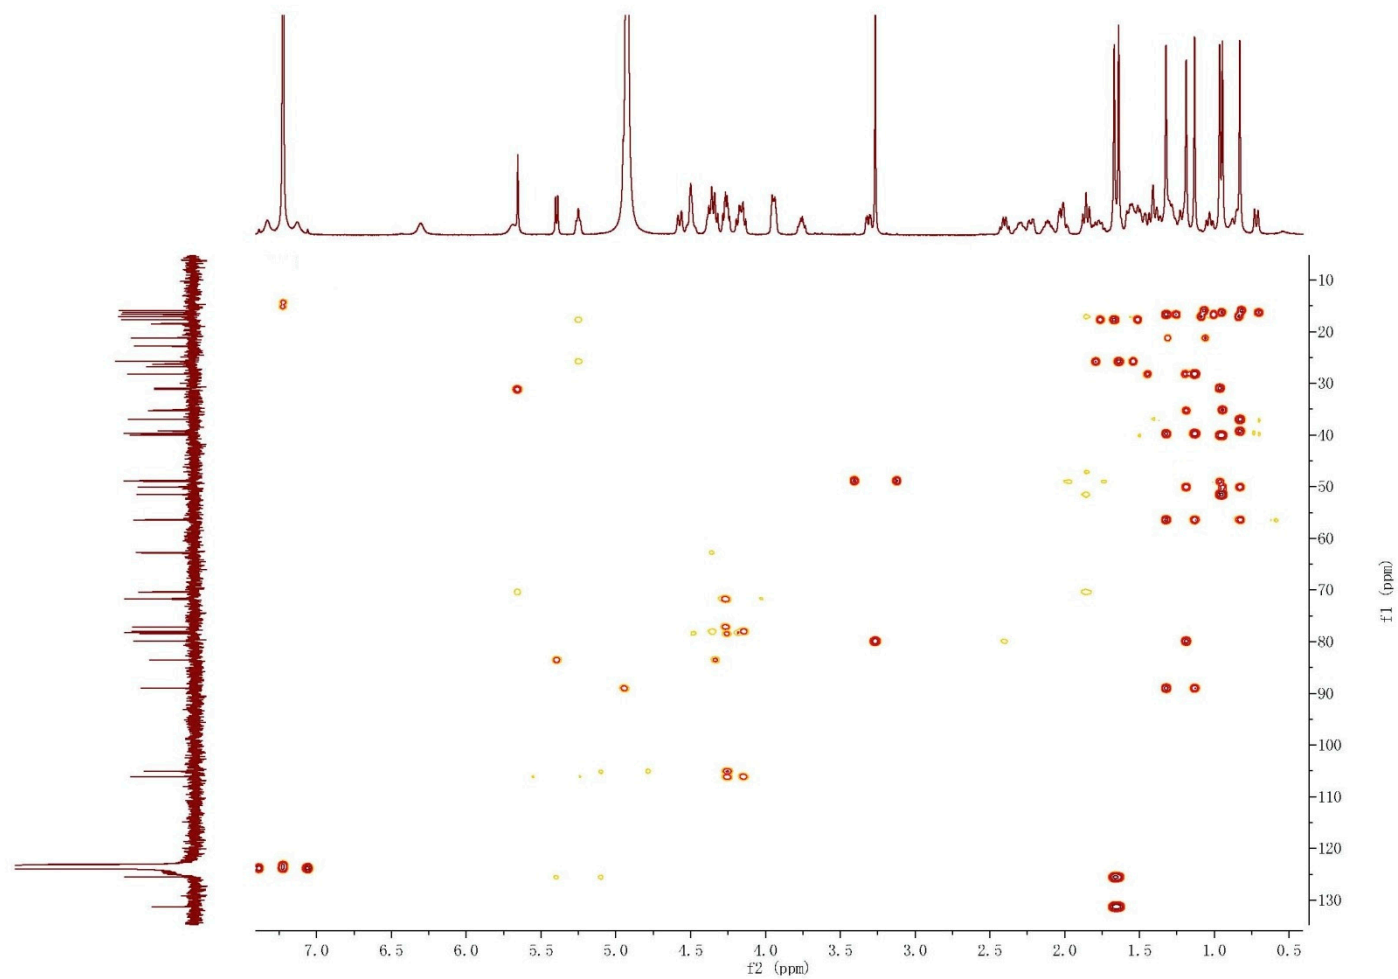

**Figure S10.** HMBC spectrum of compound **1** in pyridine-*d*<sub>5</sub>.

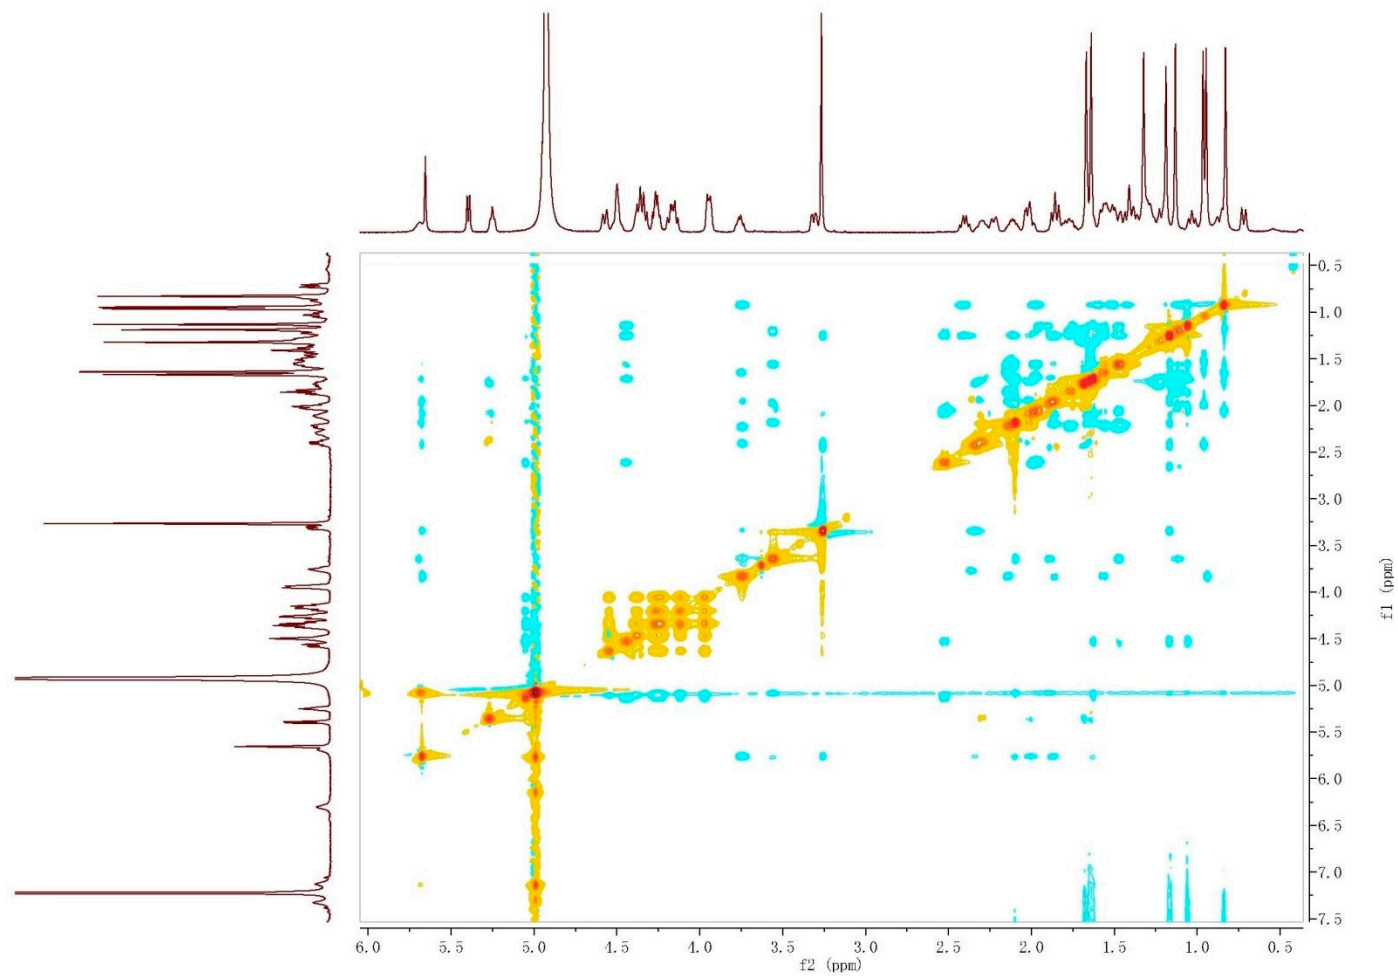

**Figure S11.** ROESY spectrum of compound **1** in pyridine-*d*<sub>5</sub>.



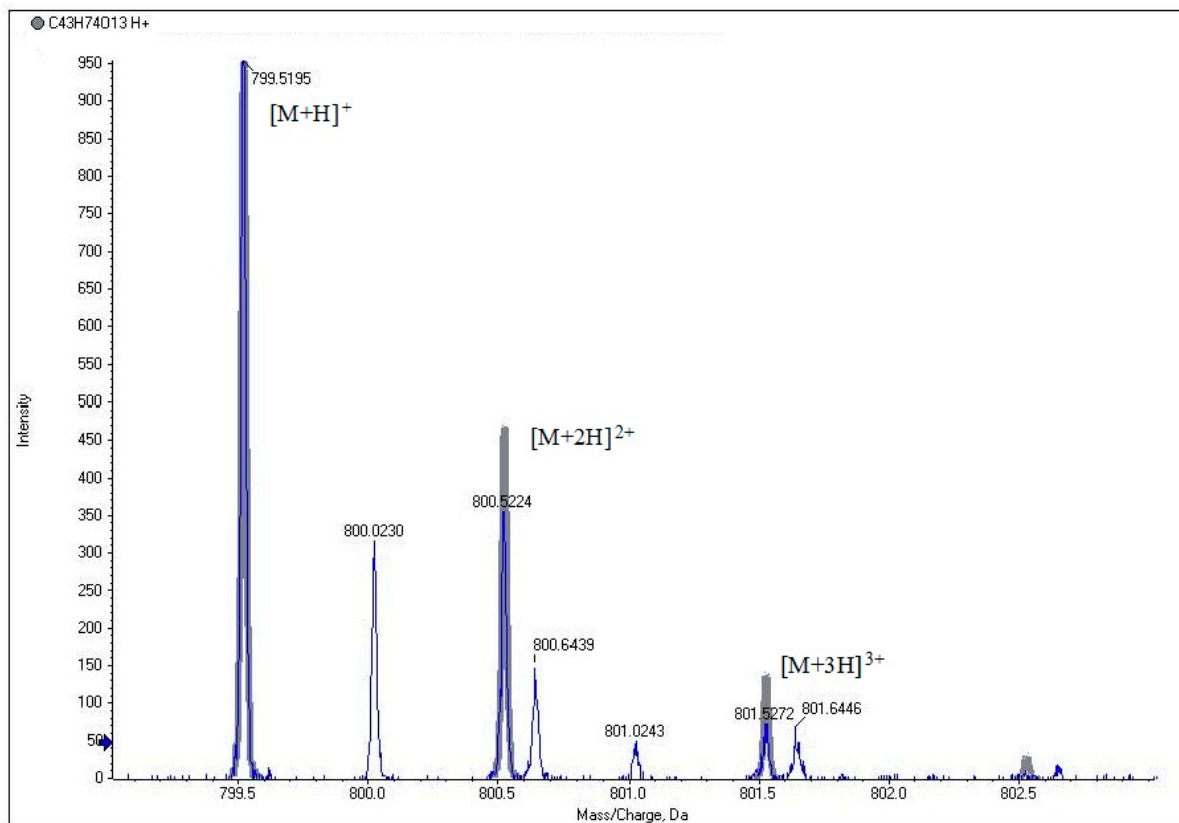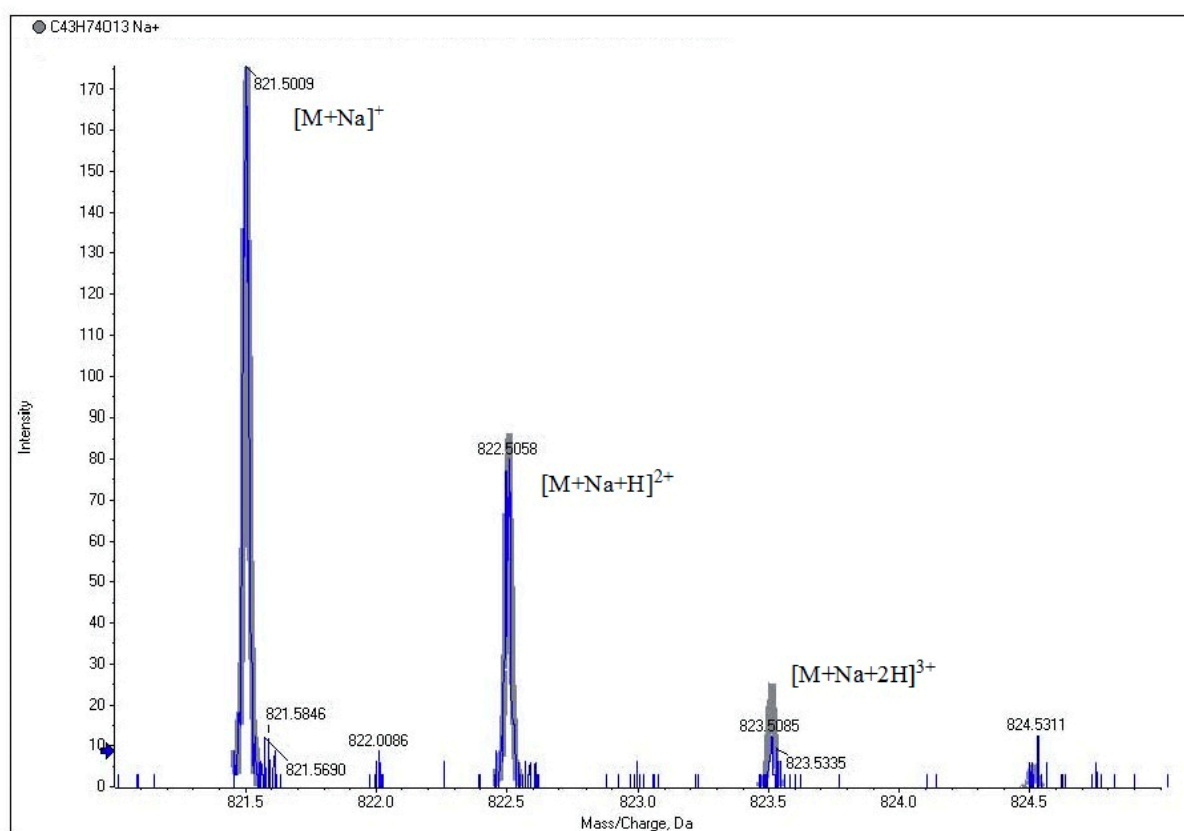

Figure S12. MS spectra of compound 1.

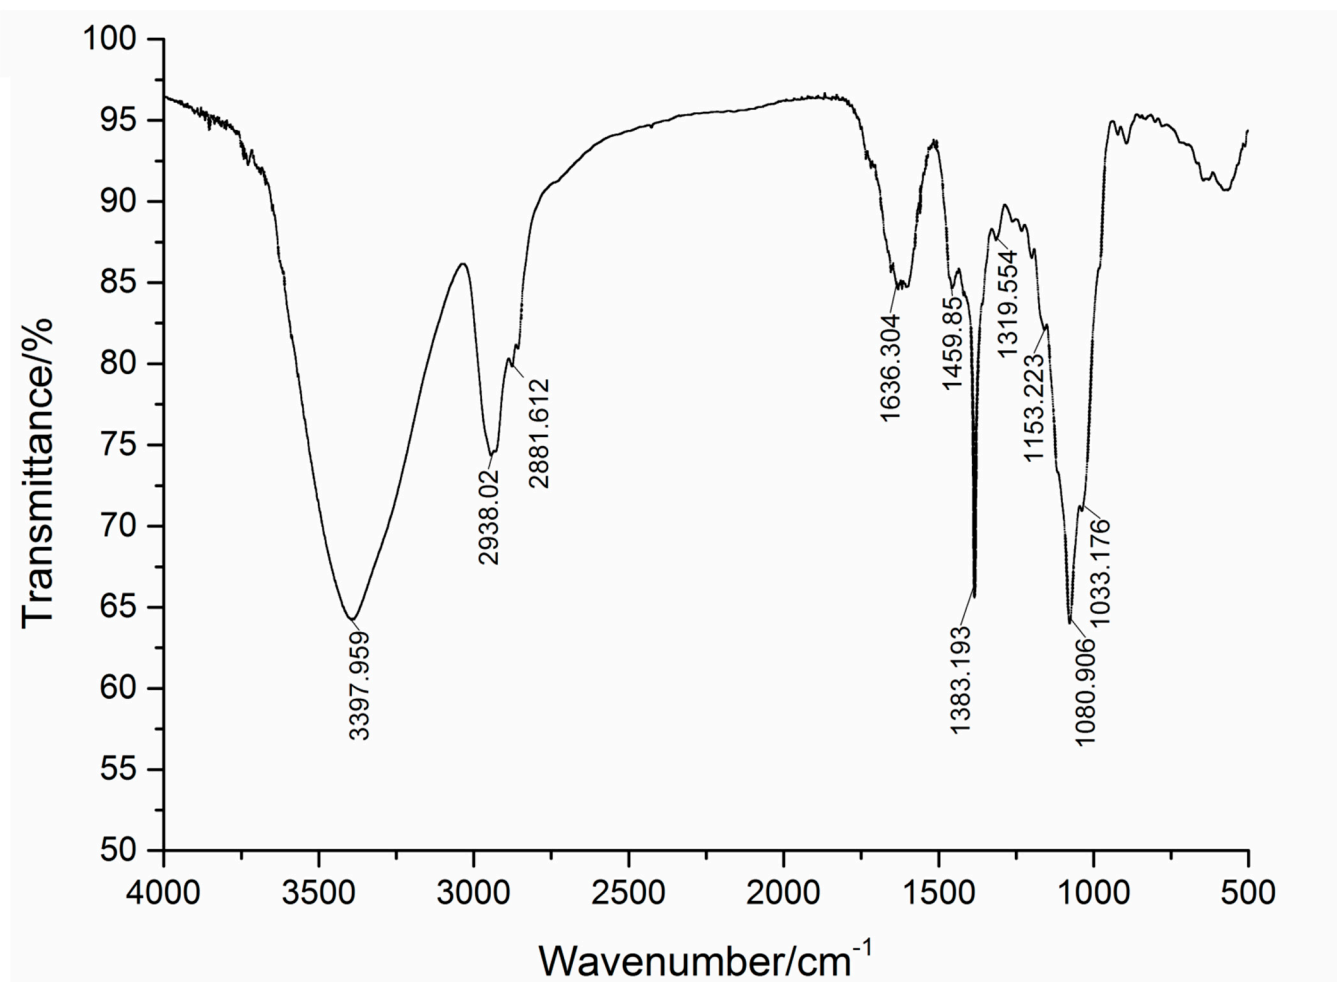

Figure S13. IR spectrum of compound 1.

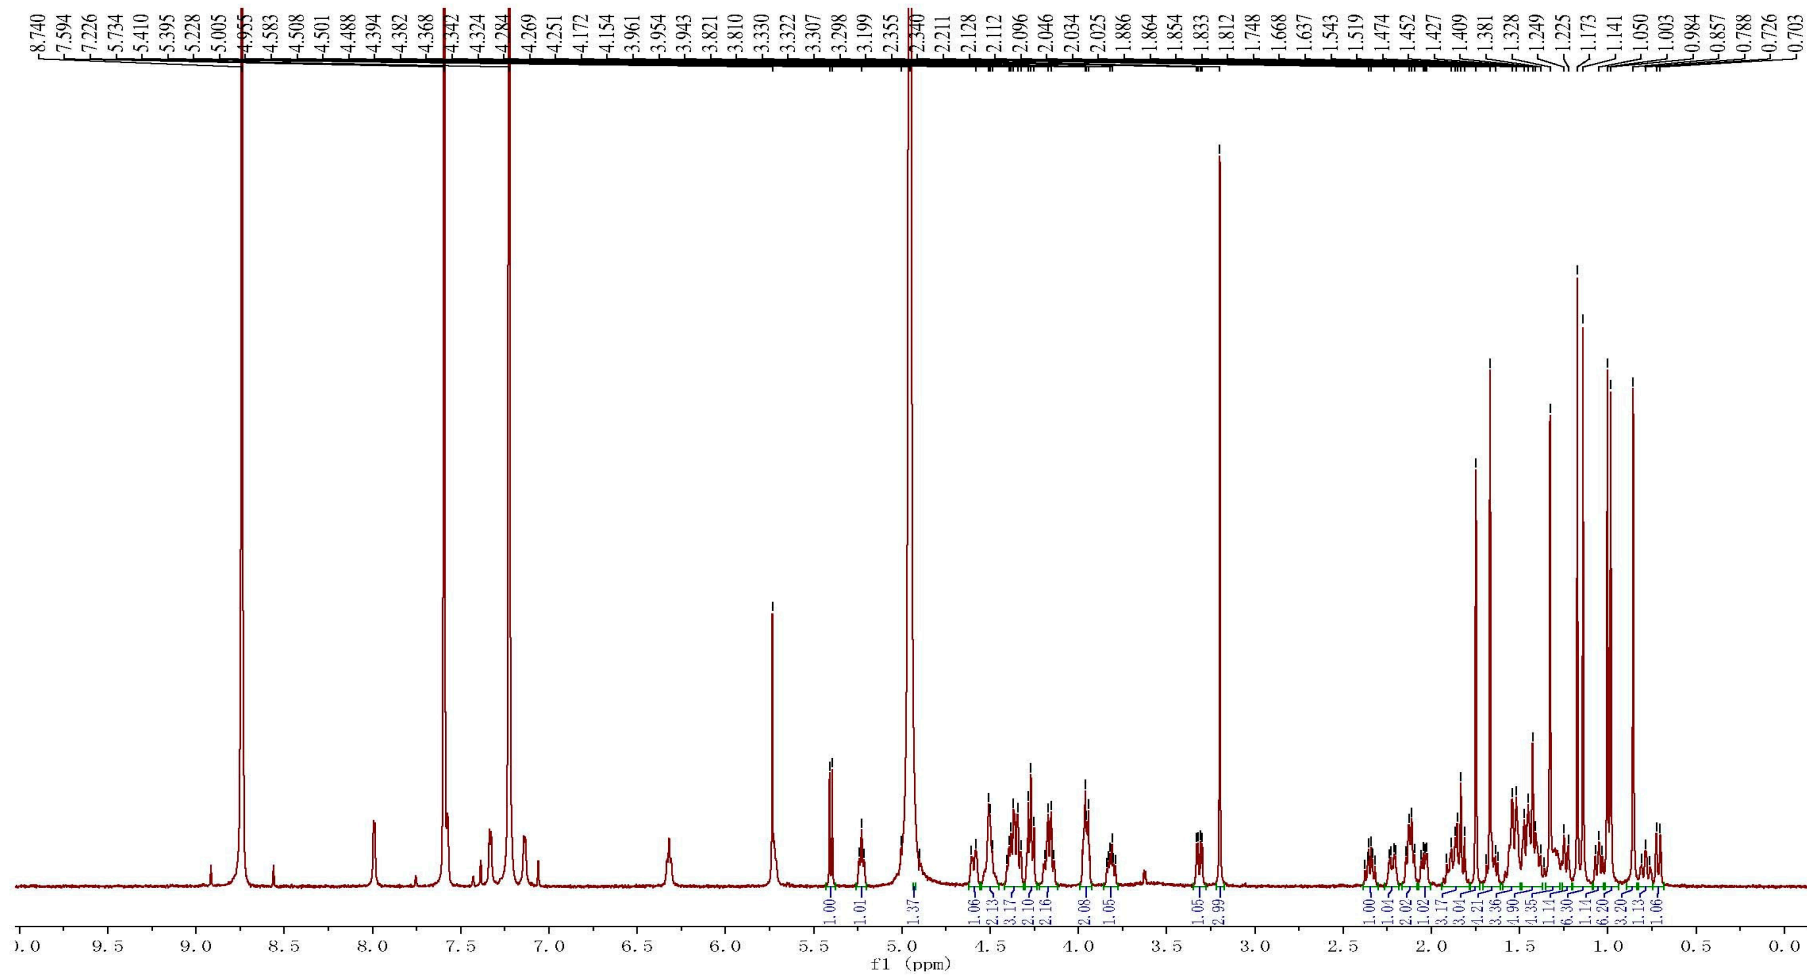

Figure S14. <sup>1</sup>H NMR spectrum of compound 2 in pyridine-*d*<sub>5</sub>.

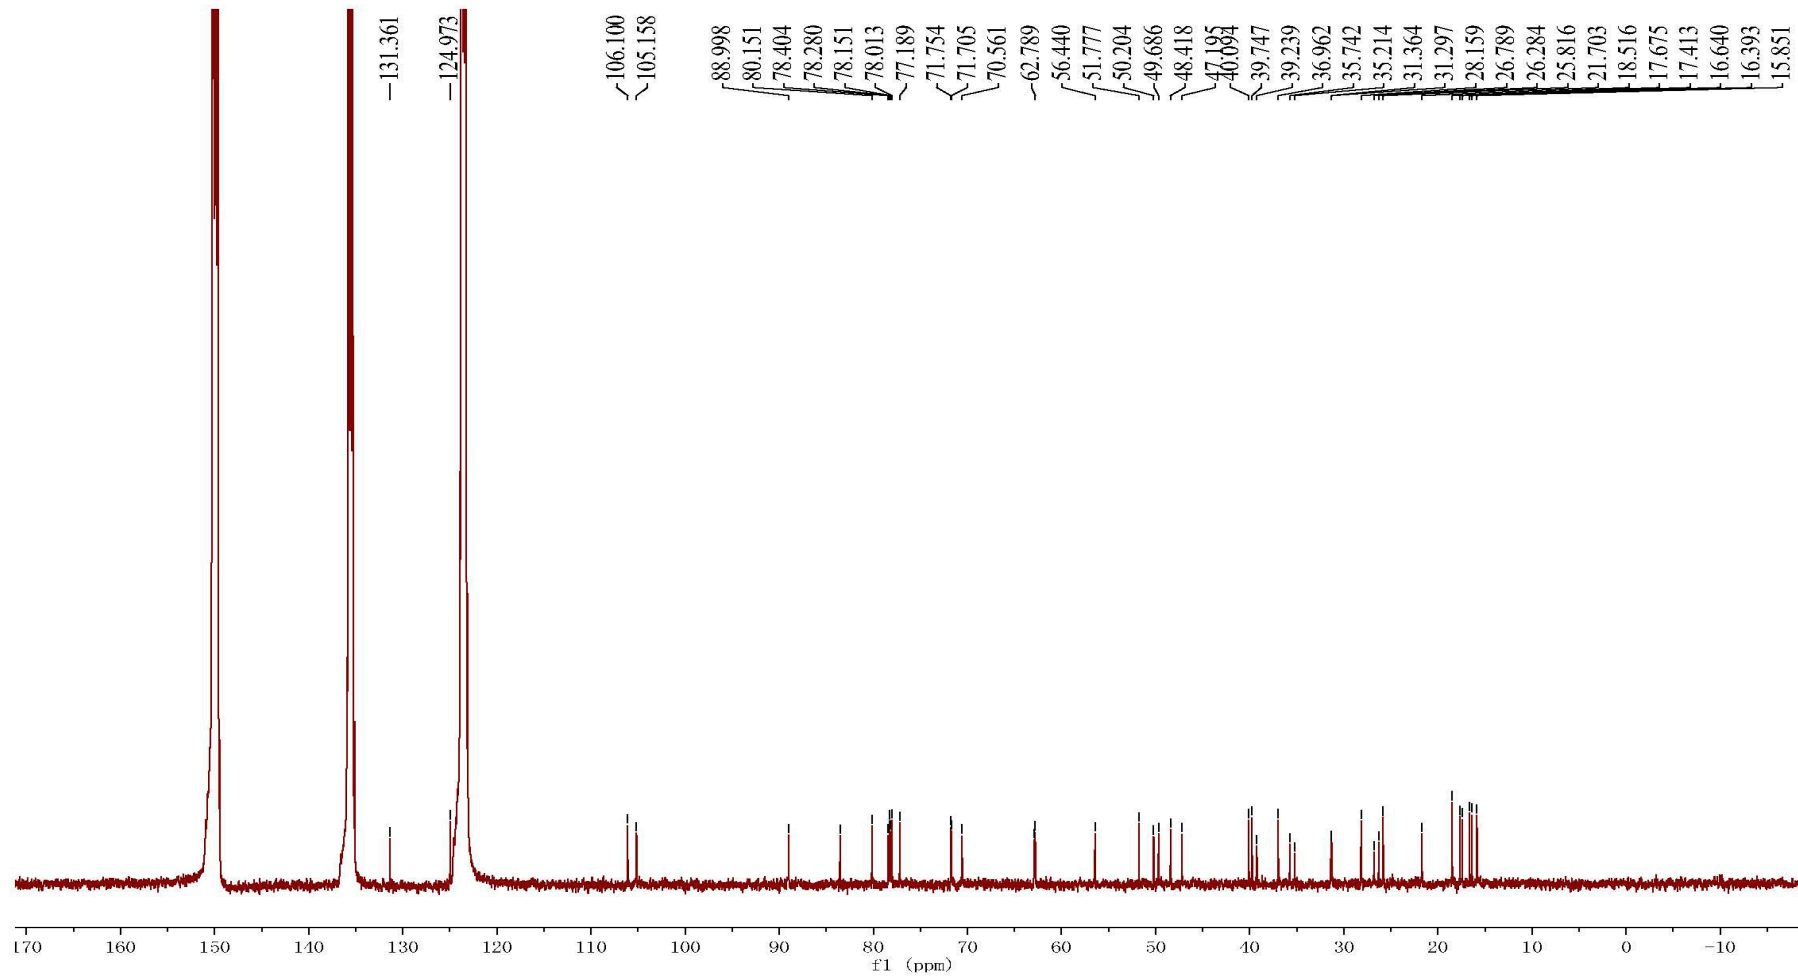

**Figure S15.**  $^{13}\text{C}$  NMR spectrum of compound 2 in pyridine- $d_5$ .

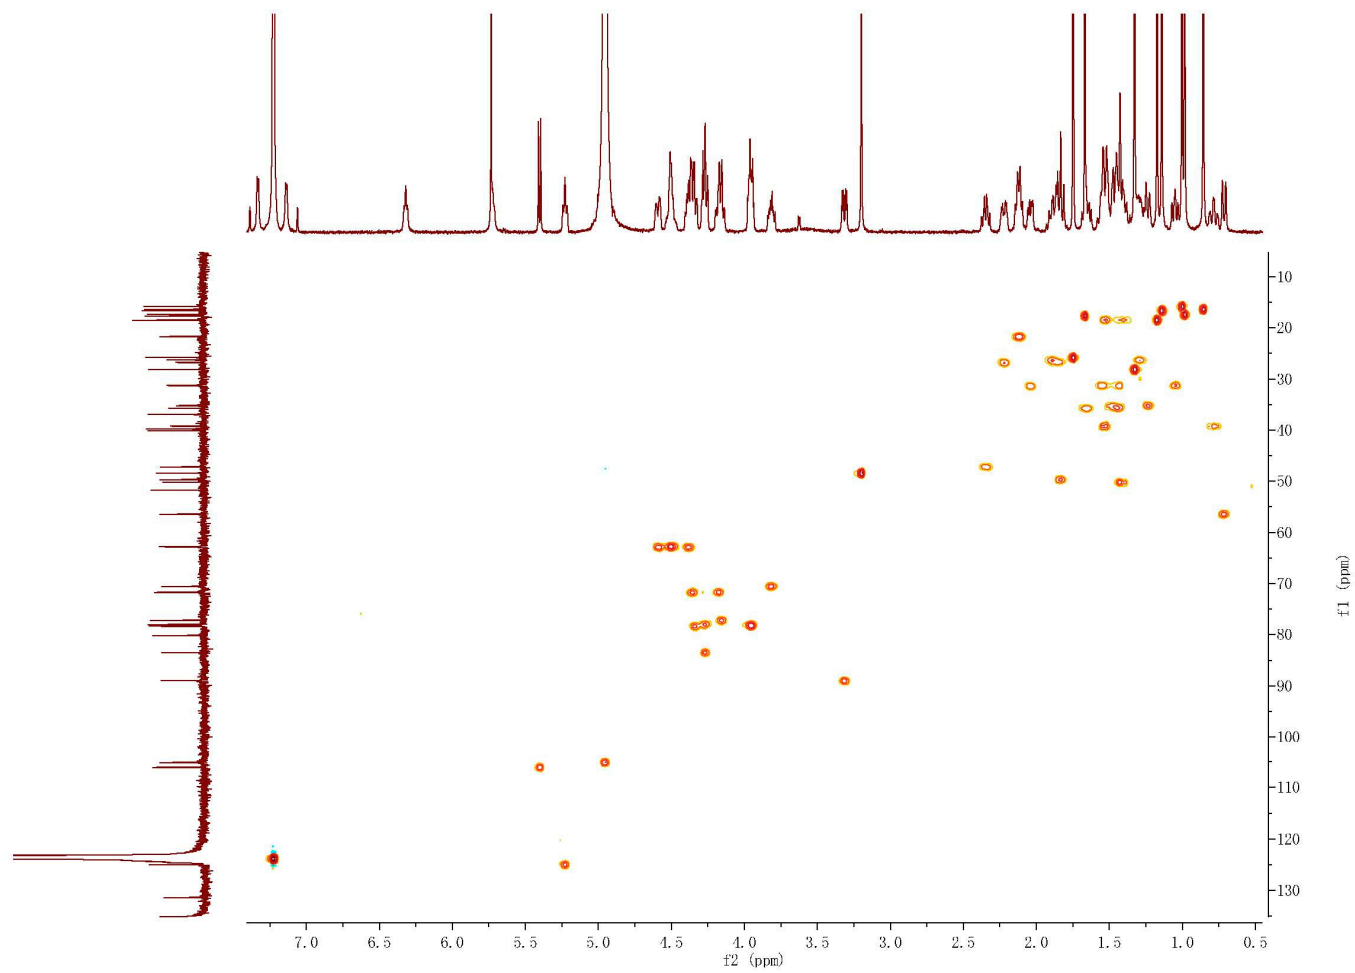

**Figure S16.** HSQC spectrum of compound 2.

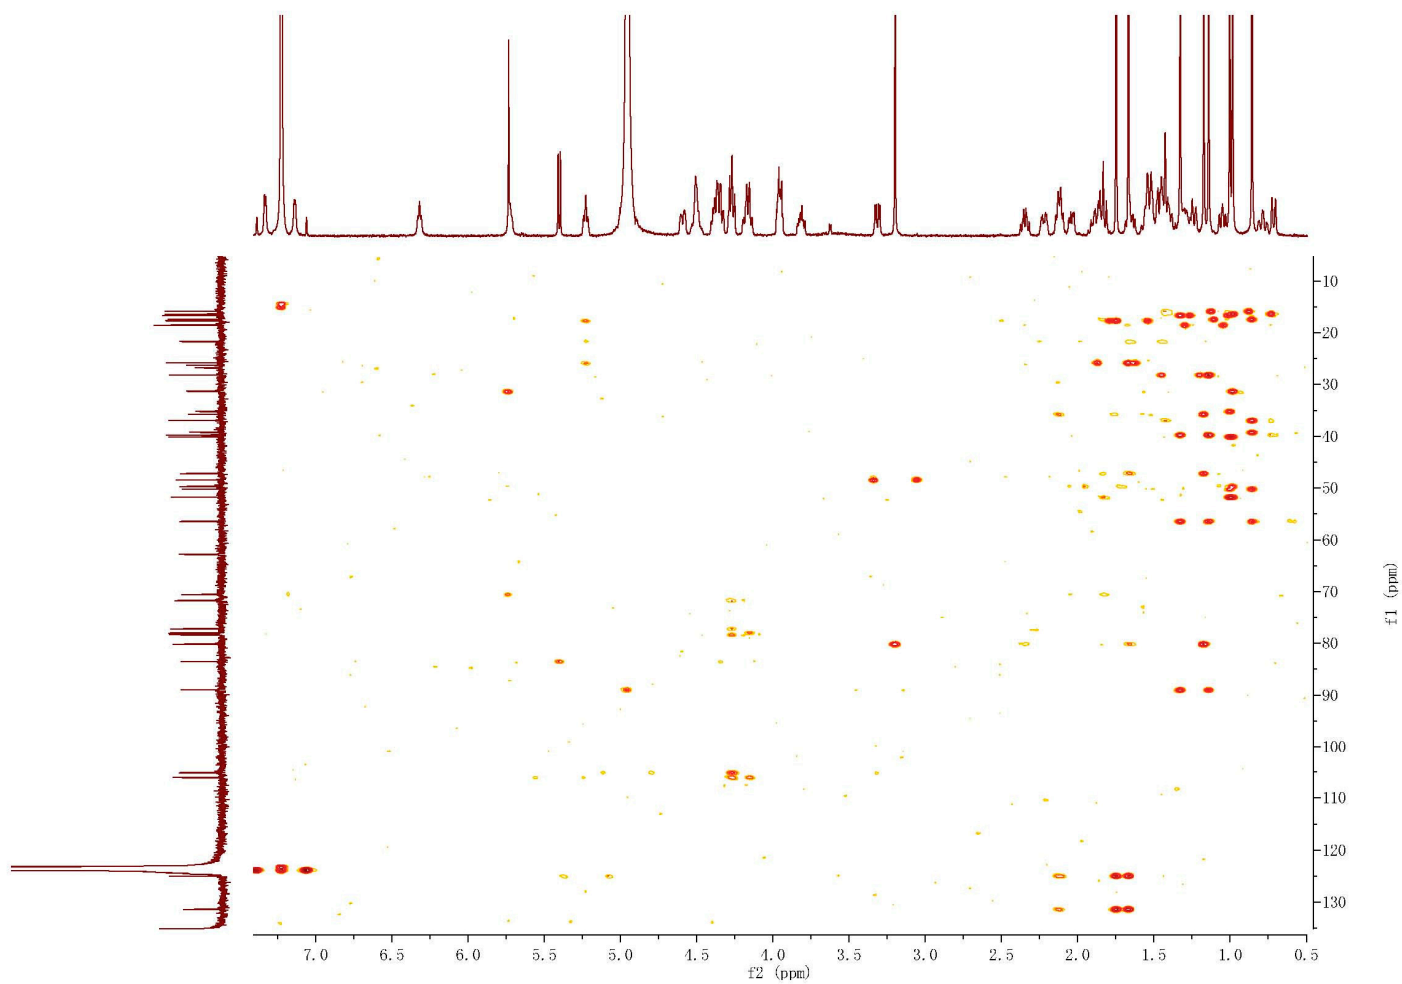

**Figure S17.** HMBC spectrum of compound **2**

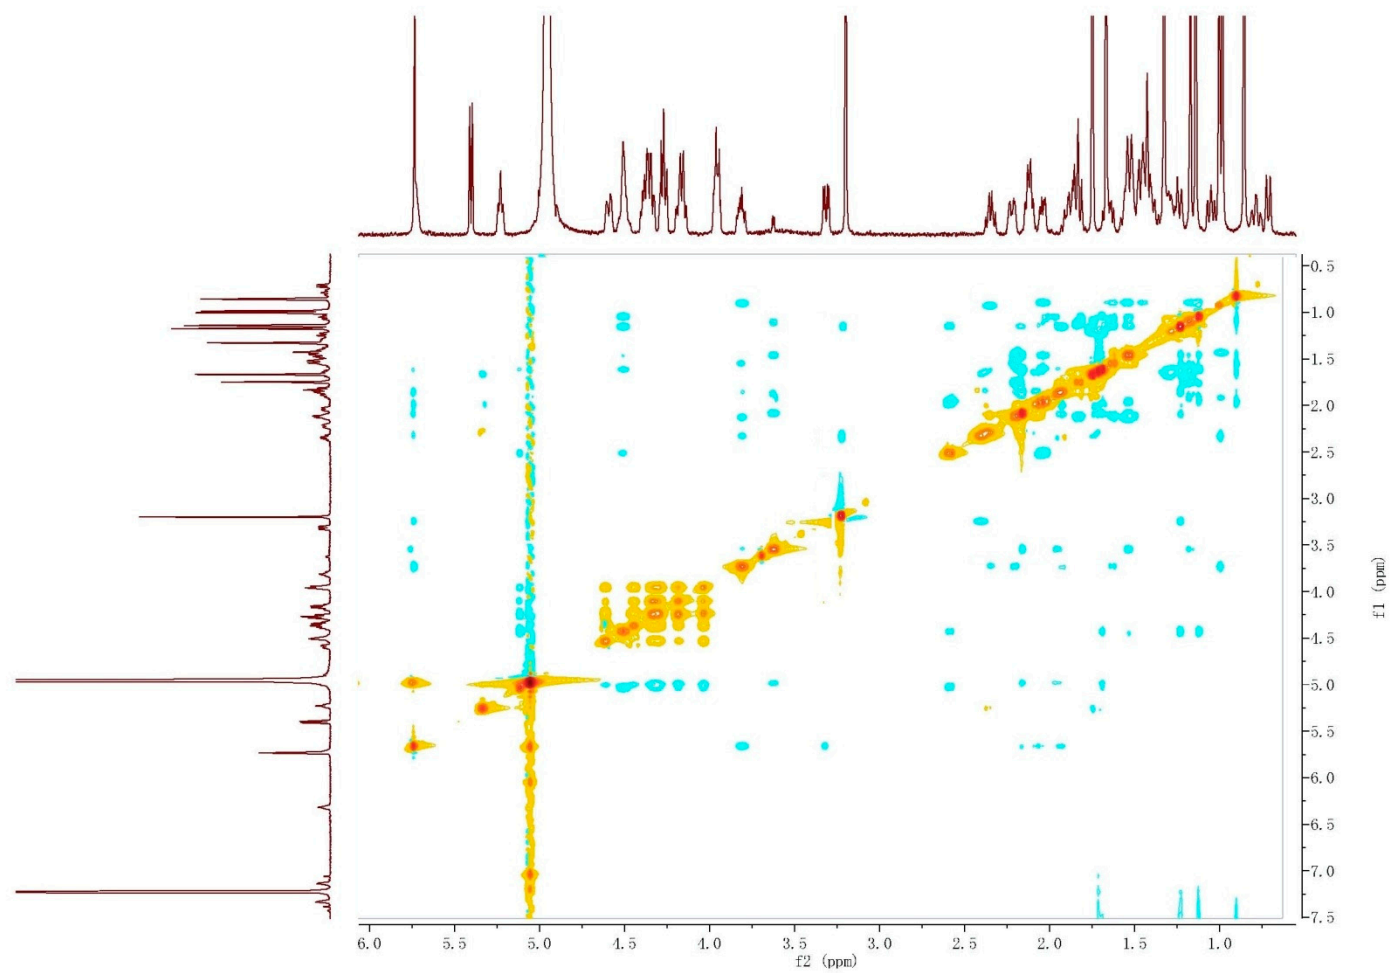

**Figure S18.** ROESY spectrum of compound **2**.

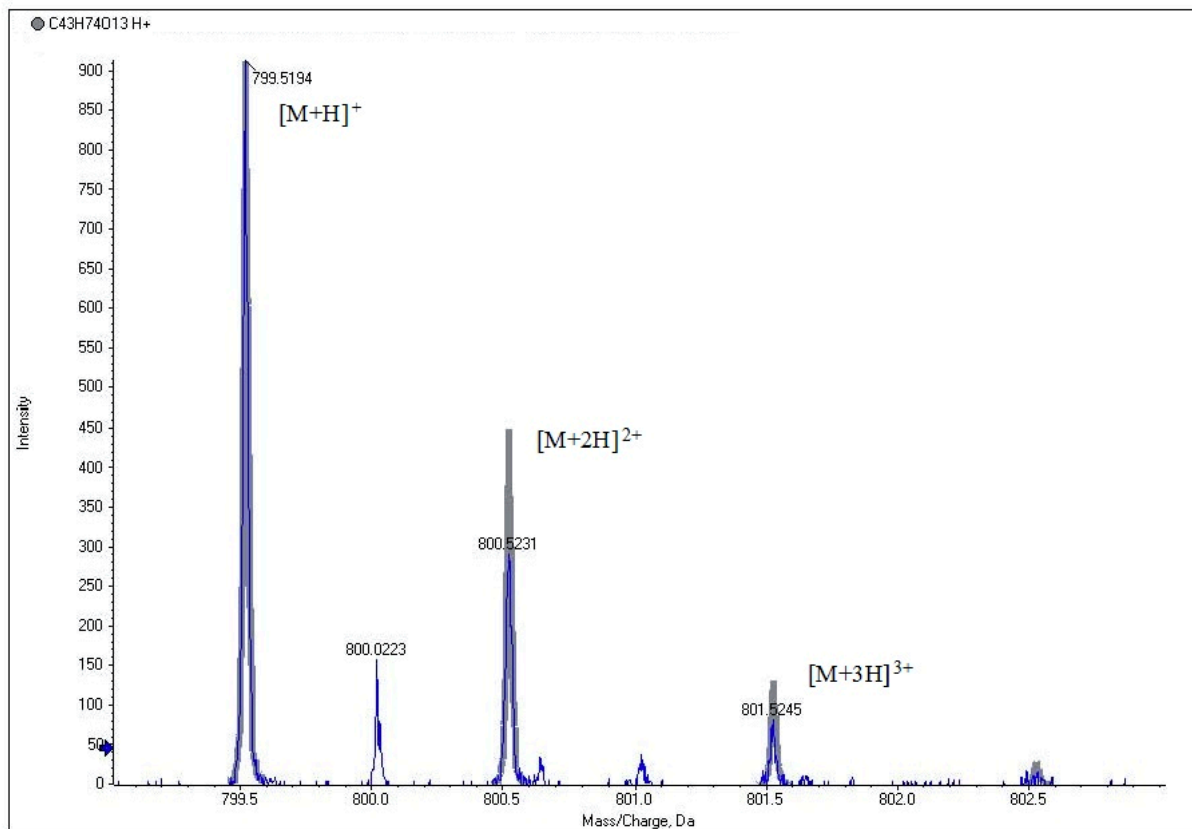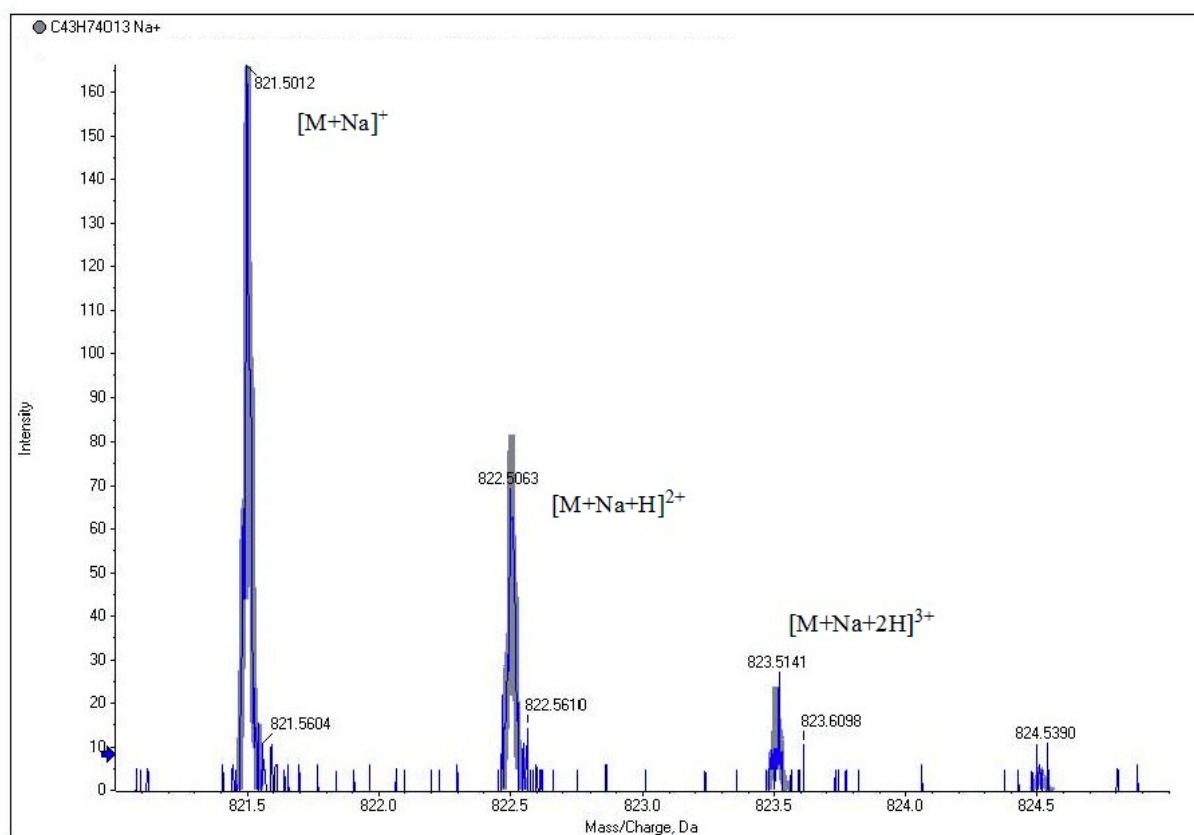

Figure S19. MS spectra of compound 2.



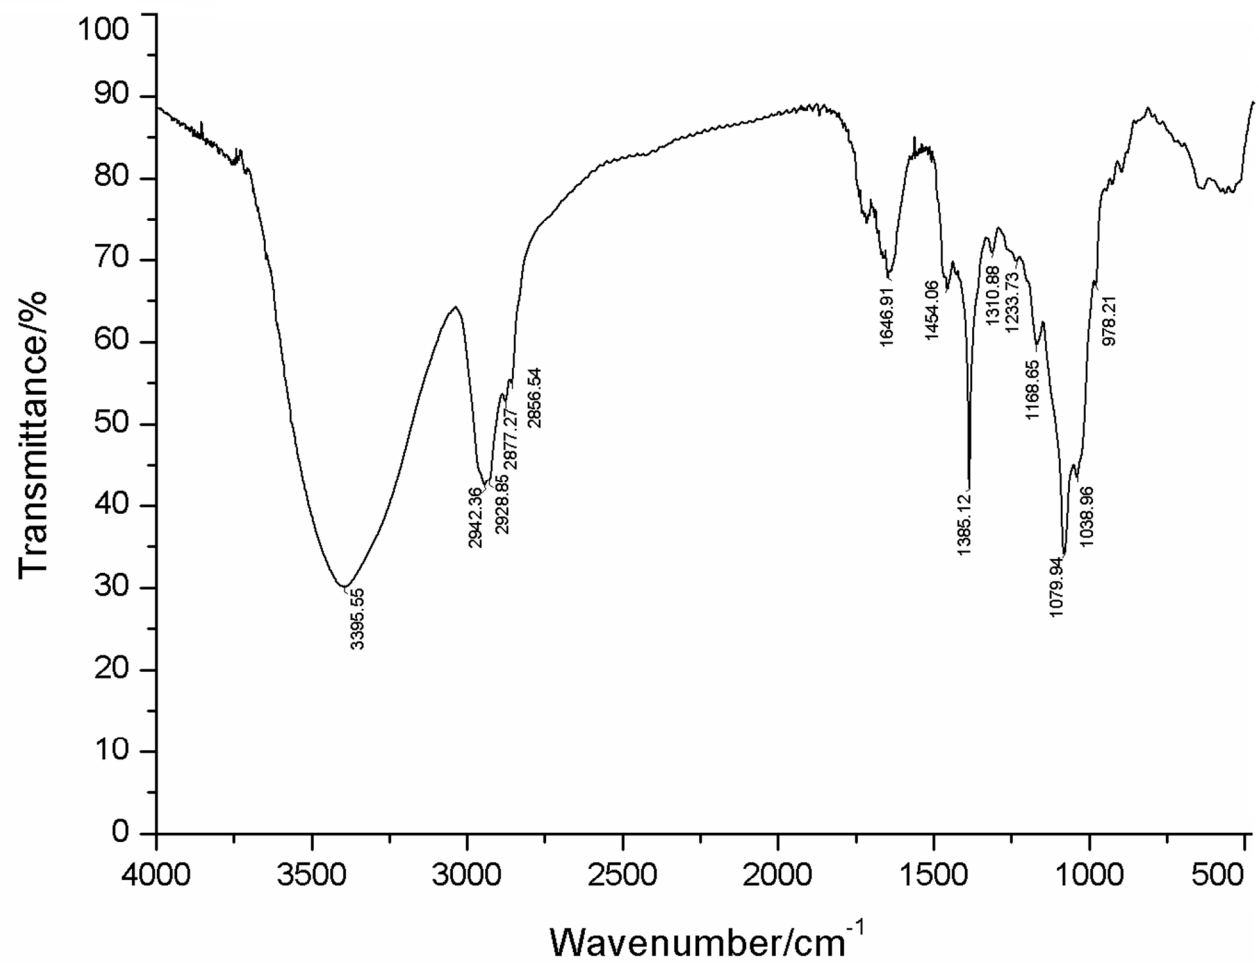

**Figure S20.** IR spectrum of compound 2.
